# Supplementary material
Source: publisher site journal article supplement (https://www.dovepress.com/article/293496)
Supplement: Supplementary file 1 [file get_supplementary_file.php]

**Supplementary materials**

Supplement 1: Flowchart

Supplement 2: Performance of non-imputed machine learning models

Supplement 3: Missing variables

Supplement 4: Distribution of blood culture through the admission period

**Supplement 1**: Flowchart

Figure S1 Flowchart


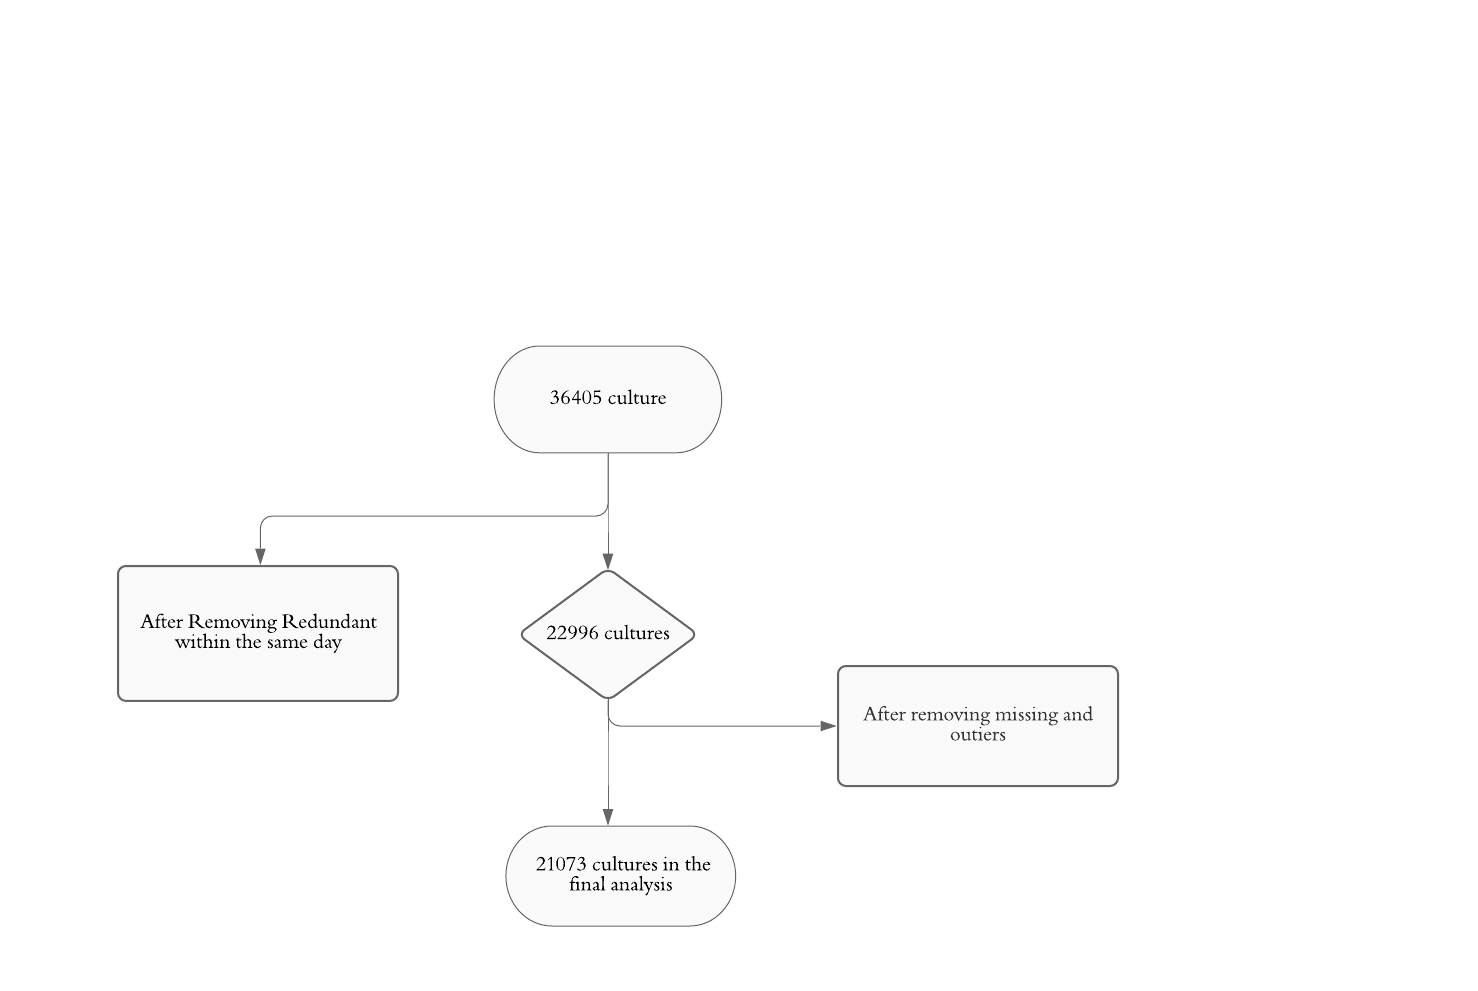


**Supplement 2**: Performance of non-imputed machine learning models (n = 10516)

Table S1 Performance of non-imputed machine learning models (n = 10516)

| Algorithm | Accuracy | Precision | Specificity | Sensitivity | AUC |
| --- | --- | --- | --- | --- | --- |
| Decision Tree | 0.80 | 0.08 | 0.85 | 0.15 | 0.50 |
| SVM | 0.92 | - | 1 | 0 | 0.50 |
| Random Forest | 0.77 | 0.13 | 0.81 | 0.35 | 0.58 |
| Logistic Regression | 0.67 | 0.11 | 0.69 | 0.45 | 0.57 |
| NN | 0.75 | 0.14 | 0.78 | 0.40 | 0.59 |
| NB | 0.80 | 0.11 | 0.85 | 0.23 | 0.54 |

Abbreviations: SVM: Support Vector Machine, NN: Neural Networks, NB: naïve Bayes.

**Supplement 3**: Missing variables

Among data for 22996 episodes of blood cultures, those are the missing numbers of the variables.

Table S2 Missing variables

Among data for 22996 episodes of blood cultures, those are the missing numbers of the variables.

| Variable | Number of missing |
| --- | --- |
| Platelet Count | 2191 |
| White Blood Cell Count | 2191 |
| Albumin Level | 5109 |
| Creatinine Level | 2203 |
| Sodium Level, Serum | 2220 |
| Respiratory rate | 892 |
| SBR | 1154 |
| TEMP | 1267 |
| DBR | 1152 |
| HR | 931 |
| Lactic Acid Level | 14855 |
| CRP Level | 18621 |
| Procalcitonin Level | 21846 |

- SBR: Systolic blood pressure, DBR: diastolic blood pressure, HR: heart rate.

**Supplement 4**: Distribution of blood culture through the admission period

Figure S2 Distribution of blood culture through the admission period
